# Supplementary material for: Phytotoxicity of Silver Nanoparticles on Tobacco Plants: Evaluation of Coating Effects on Photosynthetic Performance and Chloroplast Ultrastructure
Source: PubMed Central journal article supplement (PMC8002358; doi:10.3390/nano11030744), 2021-03-16
Supplement: nanomaterials-11-00744-s001.pdf [file nanomaterials-11-00744-s001.pdf]

# Phytotoxicity of Silver Nanoparticles on Tobacco Plants: Evaluation of Coating Effects on Photosynthetic Performance and Chloroplast Ultrastructure

Petra Peharec Štefanić<sup>1</sup>, Karla Košpić<sup>1</sup>, Daniel Mark Lyons<sup>2</sup>, Lara Jurković<sup>2</sup>, Biljana Balen<sup>1</sup> and Mirta Tkalec<sup>1,\*</sup>

<sup>1</sup> Department of Biology, Faculty of Science, University of Zagreb, Horvatovac 102a, HR-10000 Zagreb, Croatia; ppeharec@biol.pmf.hr (P.P.Š.); karla.kospic@biol.pmf.hr (K.K.); bbalen@biol.pmf.hr (B.B.)

<sup>2</sup> Center for Marine Research, Ruđer Bošković Institute, G. Paliaga 5, 52210 Rovinj, Croatia; Daniel.Mark.Lyons@irb.hr (D.M.L.); Lara.Jurkovic@irb.hr (L.J.)

\* Correspondence: mtkalec@biol.pmf.hr

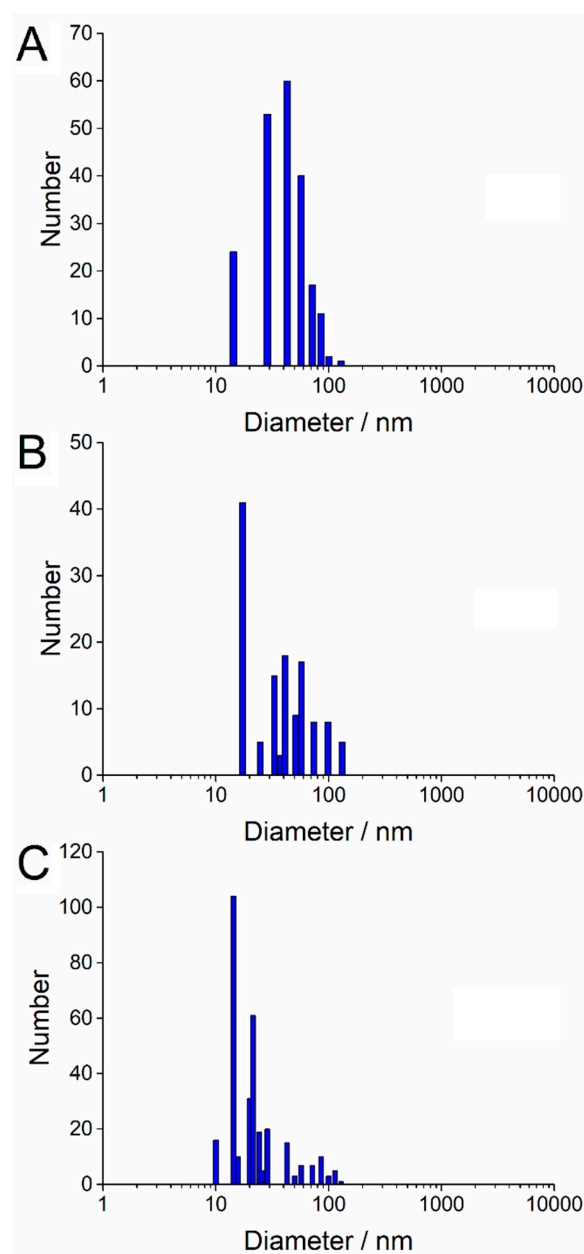

**Figure S1.** Size distribution diagrams obtained from TEM images of stock solutions of AgNPs coated with A) citrate (AgNP-citrate), B) polyvinylpyrrolidone (PVP; AgNP-PVP) and C) cetyltrimethylammonium bromide (CTAB; AgNP-CTAB) in ultrapure water.

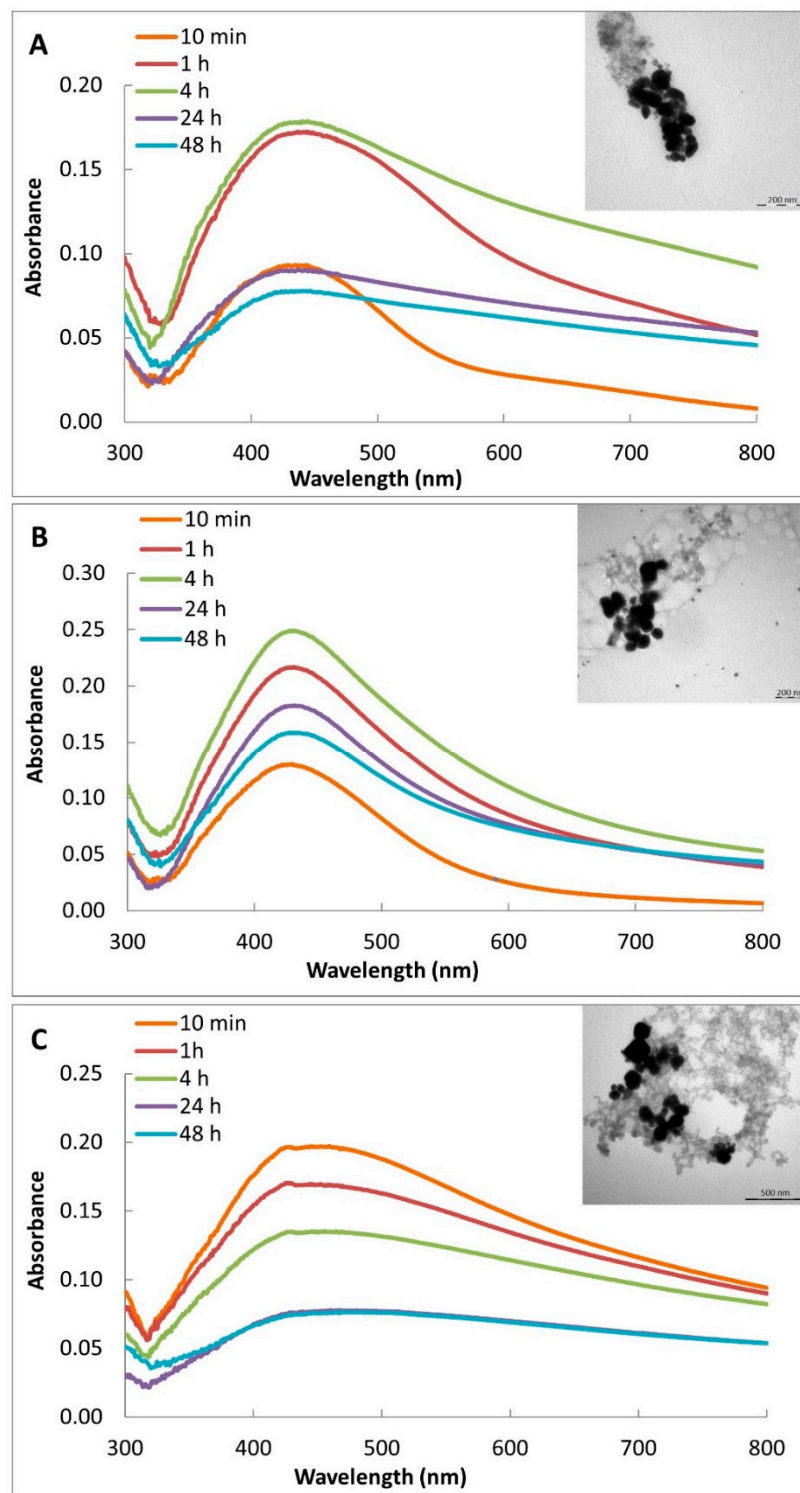

**Figure S2.** UV-Vis absorption spectra of 100  $\mu\text{M}$  AgNPs in a liquid  $\frac{1}{2}$  strength MS medium recorded over a period of 48 hours; (A) AgNP-citrate, (B) AgNP-PVP and (C) AgNP-CTAB. Insets show AgNP agglomeration recorded after 4 h by TEM analyses.
